# Supplementary material for: Estimating Population Size for Capercaillie (Tetrao urogallus L.) with Spatial Capture-Recapture Models Based on Genotypes from One Field Sample
Source: PubMed Central journal article supplement (PMC4472805; doi:10.1371/journal.pone.0129020), 2015-06-18
Supplement: pone.0129020.s003.pdf [file pone.0129020.s003.pdf]

## **Estimating population size for capercaillie (*Tetrao urogallus* L.) with spatial capture-recapture models based on genotypes from one field sample**

Pierre Mollet, Marc Kéry, Beth Gardner, Gilberto Pasinelli, J. Andrew Royle

DOI: 10.1371/journal.pone.0129020

### **Supporting Information**

S1 Table: Locations of all 466 capercaillie samples with sex and consensus genotype

This table contains the locations where our capercaillie samples were found. Identified genotypes in the table (tu001, tu002, ...) correspond to the individuals  $i$  in our model.

S2 Table: Subunit's centroids locations

This table contains the locations of the "traps" ( $j$ ) in our statistical model.

Coordinates X and Y of both tables are in Swiss Grid (CH1903) coordinates.
